# Supplementary material
Source: PubMed Central journal article supplement (PMC5710273)

## Supplementary Online Content

Patel MS, Benjamin EJ, Volpp KG, et al. Effect of a game-based intervention designed to enhance social incentives to increase physical activity among families: the BE FIT randomized clinical trial. *JAMA Intern Med*. Published online October 2, 2017. doi:10.1001/jamainternmed.2017.3458

**eTable 1.** Characteristics of Participants in the Singleton Arm

**eTable 2.** Family Structure for Participants in the Control and Gamification Arms

**eTable 3.** Characteristics of Participants That Received an Intervention Based on the Activity Tracking Device Used

**eTable 4.** Characteristics of All Individuals That Were Invited to Participate and Comparisons to Those That Participated as a Team With Their Family and Those That Participated Individually

**eTable 5.** Missing Data Rates by Arm and Study Period

**eTable 6.** Adjusted Models Using Only Collected Data Without Multiple Imputation

**eTable 7.** Adjusted Models Using Only Collected Data Without Multiple Imputation but Excluding Values Less Than 1000

**eTable 8.** Safety Data

**eTable 9.** Participant End of Study Survey Responses by Arm

**eFigure.** Coffee Mug Reward for Participants in the Gamification Arm Ending the Intervention in the Gold or Platinum Status

This supplementary material has been provided by the authors to give readers additional information about their work.

**eTable 1.** Characteristics of Participants in the Singleton Arm

| Characteristic                                  | Singletons<br>(n=46) |
|-------------------------------------------------|----------------------|
| <b>Sociodemographics</b>                        |                      |
| Age, mean (SD)                                  | 54.0 (11.7)          |
| Female Sex, No. (%)                             | 28/46 (60.9)         |
| Race/Ethnicity, No. (%)                         |                      |
| White non-hispanic                              | 46/46 (100.0)        |
| Education, No. (%)                              |                      |
| High school graduate                            | 0/45 (0.0)           |
| Some college                                    | 13/45 (28.9)         |
| College graduate                                | 32/45 (71.1)         |
| Marital status, No. (%)                         |                      |
| Single                                          | 4/45 (8.9)           |
| Married                                         | 36/45 (80.0)         |
| Other                                           | 5/45 (11.1)          |
| Annual household income, No. (%)                |                      |
| Less than \$55,000                              | 6/35 (17.1)          |
| \$55,000 to \$100,000                           | 11/35 (31.4)         |
| Greater than \$100,000                          | 18/35 (51.4)         |
| <b>Baseline measures</b>                        |                      |
| Atrial fibrillation, No. (%)                    | 1/46 (2.2)           |
| Body mass index, mean (SD)                      | 27.5 (5.7)           |
| Cardiovascular disease, No. (%)                 | 1/46 (2.2)           |
| Current Smoker, No. (%)                         | 2/45 (4.4)           |
| Diabetes, No. (%)                               | 3/45 (6.7)           |
| Framingham Risk Score, mean (SD)                | 7.0 (7.0)            |
| Hypertension, No. (%)                           | 7/45 (15.6)          |
| Hyperlipidemia, No. (%)                         | 8/45 (17.8)          |
| <b>Physical activity measures</b>               |                      |
| Baseline step count, mean (SD)                  | 7722 (3897)          |
| Step Goal Selection                             |                      |
| 33% step increase from baseline, No. (%)        | 15 (32.6%)           |
| 40% step increase from baseline, No. (%)        | 5 (10.9%)            |
| 50% step increase from baseline, No. (%)        | 4 (8.7%)             |
| Set custom goal, No. (%)                        | 22 (47.8%)           |
| Increase from baseline to goal, mean steps (SD) | 2397 (1222)          |
| Step Tracking Device                            |                      |
| Wearable Device, No. (%)                        | 32 (69.6)            |
| Smartphone Application, No. (%)                 | 14 (30.4)            |

\*46 individuals still wanted to participant when another family member was not available or interested. We allowed these individuals to participate in a control arm that was not part of the main trial or analysis. This group was called the “singleton arm” and this process was approved by the institutional review boards. They received the same interventions as the control arm in the main trial (establish a baseline step count, select a goal, and receive daily performance feedback on goal attainment for 24 weeks) but participated alone rather than with their family.

**eTable 2.** Family Structure for Participants in the Control and Gamification Arms

| <b>Family Relation</b> | <b>Control<br/>(n = 102)</b> | <b>Gamification<br/>(n = 98)</b> |
|------------------------|------------------------------|----------------------------------|
| Families of 2 persons  |                              |                                  |
| Siblings               | 62                           | 62                               |
| Spouses                | 6                            | 4                                |
| Parent-child           | 16                           | 14                               |
| Families of 3 persons  |                              |                                  |
| Siblings               | 12                           | 12                               |
| Spouses                | 0                            | 3                                |
| Parent-child           | 6                            | 3                                |

**eTable 3.** Characteristics of Participants That Received an Intervention Based on the Activity Tracking Device Used

| Characteristic                   | Participated as Team with Wearable (n=156) | Participated as Team with Smartphone (n=44) | Participated as Singleton with Wearable (n=32) | Participated as Singleton with Smartphone (n=14) |
|----------------------------------|--------------------------------------------|---------------------------------------------|------------------------------------------------|--------------------------------------------------|
| Age, mean (SD)                   | 50.1 (11.0)                                | 48.7 (9.3)                                  | 47.1 (13.3)                                    | 46.7 (10.2)                                      |
| Female Sex, n (%)                | 93/156 (59.6)                              | 19/44 (43.2)                                | 19/32 (59.4)                                   | 9/14 (64.3)                                      |
| Race/Ethnicity, n (%)            |                                            |                                             |                                                |                                                  |
| White non-hispanic               | 156/156 (100)                              | 44/44 (100)                                 | 32/32 (100)                                    | 14/14 (100)                                      |
| Education, n (%)                 |                                            |                                             |                                                |                                                  |
| Less than high school            | 0/150 (0.0)                                | 0/40 (0.0)                                  | 0/32 (0.0)                                     | 0/13 (0.0)                                       |
| High school graduate             | 10/150 (6.7)                               | 1/40 (2.5)                                  | 0/32 (0.0)                                     | 0/13 (0.0)                                       |
| Some college                     | 33/150 (22.0)                              | 6/40 (15.0)                                 | 10/32 (31.3)                                   | 3/13 (23.1)                                      |
| College graduate                 | 107/150 (71.3)                             | 33/40 (82.5)                                | 22/32 (68.8)                                   | 10/13 (76.9)                                     |
| Marital status, n (%)            |                                            |                                             |                                                |                                                  |
| Single                           | 17/151 (11.3)                              | 3/40 (7.5)                                  | 4/32 (12.5)                                    | 0/13 (0.0)                                       |
| Married                          | 123/151 (81.5)                             | 34/40 (85.0)                                | 26/32 (81.3)                                   | 10/13 (76.9)                                     |
| Other                            | 11/151 (7.3)                               | 3/40 (7.5)                                  | 2/32 (6.3)                                     | 3/13 (23.1)                                      |
| Annual household income, n (%)   |                                            |                                             |                                                |                                                  |
| Less than \$55,000               | 18/118 (15.3)                              | 2/34 (5.9)                                  | 5/24 (20.8)                                    | 1/11 (9.1)                                       |
| \$55,000 to \$100,000            | 43/118 (36.4)                              | 10/34 (29.4)                                | 6/24 (25.0)                                    | 5/11 (45.5)                                      |
| Greater than \$100,000           | 57/118 (48.3)                              | 22/34 (64.7)                                | 13/24 (54.2)                                   | 5/11 (45.5)                                      |
| Baseline measures                |                                            |                                             |                                                |                                                  |
| Atrial fibrillation, n (%)       | 1/156 (0.6)                                | 1/44 (2.3)                                  | 1/32 (3.1)                                     | 0/14 (0.0)                                       |
| Body mass index, mean (SD)       | 27.2 (5.2)                                 | 26.7 (4.0)                                  | 26.9 (4.5)                                     | 28.7 (8.0)                                       |
| Cardiovascular disease, n (%)    | 6/156 (3.8)                                | 3/44 (6.8)                                  | 0/32 (0.0)                                     | 1/14 (7.1)                                       |
| Current Smoker, n (%)            | 8/151 (5.3)                                | 1/40 (2.5)                                  | 2/32 (6.3)                                     | 0/13 (0.0)                                       |
| Diabetes, n (%)                  | 7/150 (4.7)                                | 1/40 (2.5)                                  | 2/32 (6.3)                                     | 1/13 (7.7)                                       |
| Framingham Risk Score, mean (SD) | 10.8 (10.5)                                | 12.0 (12.9)                                 | 8.7 (9.0)                                      | 7.1 (6.4)                                        |
| Hypertension, n (%)              | 29/151 (19.2)                              | 10/40 (25.0)                                | 5/32 (15.6)                                    | 2/13 (15.4)                                      |
| Hyperlipidemia, n (%)            | 26/151 (17.2)                              | 14/40 (35.0)                                | 7/32 (21.9)                                    | 1/13 (7.7)                                       |

**eTable 4.** Characteristics of All Individuals That Were Invited to Participate and Comparisons to Those That Participated as a Team With Their Family and Those That Participated Individually

| Characteristic                   | Invited to Participate (n=1212) | Invited But did NOT Participate (n=966) | Received Intervention as a Team (n=200) | Received Intervention as Singleton (n=46) |
|----------------------------------|---------------------------------|-----------------------------------------|-----------------------------------------|-------------------------------------------|
| Age, mean (SD)                   | 52.0 (13.3)                     | 52.7 (13.8)                             | 49.8 (10.6)                             | 47.0 (12.4)                               |
| Female Sex, n (%)                | 626/1212 (51.7)                 | 486/966 (50.3)                          | 112/200 (56.0)                          | 28/46 (60.9)                              |
| Race/Ethnicity, n (%)            |                                 |                                         |                                         |                                           |
| White non-hispanic               | 1212/1212 (100.0)               | 966/966 (100.0)                         | 200/200 (100.0)                         | 46/46 (100.0)                             |
| Education, n (%)                 |                                 |                                         |                                         |                                           |
| Less than high school            | 7/1092 (0.6)                    | 7/857 (0.8)                             | 0/190 (0.0)                             | 0/45 (0.0)                                |
| High school graduate             | 116/1092 (10.6)                 | 105/857 (12.3)                          | 11/190 (5.8)                            | 0/45 (0.0)                                |
| Some college                     | 308/1092 (28.2)                 | 256/857 (29.9)                          | 39/190 (20.5)                           | 13/45 (28.9)                              |
| College graduate                 | 661/1092 (60.5)                 | 489/857 (57.1)                          | 140/190 (73.7)                          | 32/45 (71.1)                              |
| Marital status, n (%)            |                                 |                                         |                                         |                                           |
| Single                           | 105/1078 (9.7)                  | 81/842(9.6)                             | 20/191 (10.5)                           | 4/45 (8.9)                                |
| Married                          | 843/1078 (78.2)                 | 650/842 (77.2)                          | 157/191 (82.2)                          | 36/45 (80.0)                              |
| Other                            | 130/1078 (12.1)                 | 111/842 (13.2)                          | 14/191 (7.3)                            | 5/45 (11.1)                               |
| Annual household income, n (%)   |                                 |                                         |                                         |                                           |
| Less than \$55,000               | 127/752 (16.9)                  | 101/565 (17.9)                          | 20/152 (13.2)                           | 6/35 (17.1)                               |
| \$55,000 to \$100,000            | 274/752 (36.4)                  | 210/565 (37.2)                          | 53/152 (34.9)                           | 11/35 (31.4)                              |
| Greater than \$100,000           | 351/752 (46.7)                  | 254/565 (45.0)                          | 79/152 (52.0)                           | 18/35 (51.4)                              |
| Baseline measures                |                                 |                                         |                                         |                                           |
| Atrial fibrillation, n (%)       | 31/1212 (2.6)                   | 28/966 (2.9)                            | 2/200 (1.0)                             | 1/46 (2.2)                                |
| Body mass index, mean (SD)       | 27.9 (5.4)                      | 28.1 (5.4)                              | 27.0 (5.0)                              | 27.5 (5.7)                                |
| Cardiovascular disease, n (%)    | 78/1212 (6.4)                   | 68/966 (7.0)                            | 9/200 (4.5)                             | 1/46 (2.2)                                |
| Current Smoker, n (%)            | 76/1081 (7.0)                   | 65/845 (7.7)                            | 9/191 (4.7)                             | 2/45 (4.4)                                |
| Diabetes, n (%)                  | 58/1091 (5.3)                   | 47/856 (5.5)                            | 8/190 (4.2)                             | 3/45 (6.7)                                |
| Framingham Risk Score, mean (SD) | 11.7 (12.0)                     | 12.4 (12.6)                             | 9.4 (9.5)                               | 7.0 (7.0)                                 |
| Hypertension, n (%)              | 309/1081 (28.6)                 | 263/845 (31.1)                          | 39/191 (20.4)                           | 7/45 (15.6)                               |
| Hyperlipidemia, n (%)            | 302/1080 (28.0)                 | 254/844 (30.1)                          | 40/191 (20.9)                           | 8/42 (19.0)                               |

**eTable 5.** Missing Data Rates by Arm and Study Period

| Period                           | Control<br>(N=8568) |       | Intervention<br>(N=8232) |       |
|----------------------------------|---------------------|-------|--------------------------|-------|
|                                  | N                   | %     | N                        | %     |
| <b>Intervention (Weeks 1-12)</b> |                     |       |                          |       |
| Values missing                   | 649                 | 7.6%  | 559                      | 6.8%  |
| Values missing or < 1000 steps   | 1090                | 12.7% | 835                      | 10.1% |
| <b>Follow-up (Weeks 13-24)</b>   |                     |       |                          |       |
| Values missing                   | 2865                | 33.4% | 3280                     | 39.8% |
| Values missing or < 1000 steps   | 3166                | 37.0% | 3462                     | 42.1% |

\*N refers to the number of participant days. For example, in the control arm there were 102 participants in a 12-week period. So 102 participants x 12 weeks x 7 days/per = 8568 participant-days

**eTable 6.** Adjusted Models Using Only Collected Data Without Multiple Imputation

| Period (All Values)                           | Main Model <sup>1</sup>                                          |         | Main Model Adjusted by Device <sup>2</sup>                       |         |
|-----------------------------------------------|------------------------------------------------------------------|---------|------------------------------------------------------------------|---------|
|                                               | Intervention Effect, Adjusted for Baseline <sup>3</sup> (95% CI) | P Value | Intervention Effect, Adjusted for Baseline <sup>3</sup> (95% CI) | P Value |
| <b>Intervention (Weeks 1-12)</b>              |                                                                  |         |                                                                  |         |
| Proportion of participant-days achieving goal | 0.23<br>(0.16 - 0.39)                                            | < 0.001 | 0.22<br>(0.15 - 0.29)                                            | < 0.001 |
| Steps per day                                 | 1149<br>(657 - 1642)                                             | < 0.001 | 1218<br>(715 - 1721)                                             | < 0.001 |
|                                               |                                                                  |         |                                                                  |         |
| <b>Follow-up (Weeks 13-24)</b>                |                                                                  |         |                                                                  |         |
| Proportion of participant-days achieving goal | 0.12<br>(0.06 - 0.17)                                            | < 0.001 | 0.12<br>(0.06 - 0.18)                                            | < 0.001 |
| Steps per day                                 | 639<br>(105 - 1173)                                              | 0.02    | 683<br>(129 - 1239)                                              | 0.02    |

<sup>1</sup>Adjusted for baseline step count, repeated measures, calendar month fixed effects, and team random effect

<sup>2</sup>Adjusted for baseline step count, repeated measures, calendar month fixed effects, team random effect, and activity tracking device

<sup>3</sup>Intervention arm relative to the control arm during the specified time period; CI = confidence interval; confidence intervals obtained using the bootstrap procedure

**eTable 7.** Adjusted Models Using Only Collected Data Without Multiple Imputation but Excluding Values Less Than 1000

| Period (Excludes Values < 1000)               | Main Model <sup>1</sup>                                          |         | Main Model Adjusted by Device <sup>2</sup>                       |         |
|-----------------------------------------------|------------------------------------------------------------------|---------|------------------------------------------------------------------|---------|
|                                               | Intervention Effect, Adjusted for Baseline <sup>3</sup> (95% CI) | P Value | Intervention Effect, Adjusted for Baseline <sup>3</sup> (95% CI) | P Value |
| <b>Intervention (Weeks 1-12)</b>              |                                                                  |         |                                                                  |         |
| Proportion of participant-days achieving goal | 0.25<br>(0.11 - 0.38)                                            | < 0.001 | 0.24<br>(0.10 - 0.39)                                            | < 0.001 |
| Steps per day                                 | 1025<br>(552 - 1499)                                             | < 0.001 | 1079<br>(600 - 1559)                                             | < 0.001 |
| <b>Follow-up (Weeks 13-24)</b>                |                                                                  |         |                                                                  |         |
| Proportion of participant-days achieving goal | 0.14<br>(0.08 - 0.20)                                            | < 0.001 | 0.14<br>(0.08 - 0.20)                                            | < 0.001 |
| Steps per day                                 | 443<br>(-59 - 946)                                               | 0.08    | 476<br>(-32 - 984)                                               | 0.07    |

<sup>1</sup>Adjusted for baseline step count, repeated measures, calendar month fixed effects, and team random effect

<sup>2</sup>Adjusted for baseline step count, repeated measures, calendar month fixed effects, team random effect, and activity tracking device

<sup>3</sup>Intervention arm relative to the control arm during the specified time period; CI = confidence interval; confidence intervals obtained using the bootstrap procedure



**eTable 8. Safety Data**

| Period                          | # Survey Responses | Self-Reported Events   |      |                      |                      | ER or Hospital Visit Descriptions                                                                                                                                               |
|---------------------------------|--------------------|------------------------|------|----------------------|----------------------|---------------------------------------------------------------------------------------------------------------------------------------------------------------------------------|
|                                 |                    | Muscle or Joint Injury | Fall | Other Medical Injury | ER or Hospital Visit |                                                                                                                                                                                 |
| <b>Intervention<sup>1</sup></b> |                    |                        |      |                      |                      |                                                                                                                                                                                 |
| Control                         | 85                 | 2                      | 1    | 0                    | 5                    | Hernia repair; detached retina                                                                                                                                                  |
| Intervention                    | 76                 | 5                      | 1    | 1                    | 3                    | Cholecystectomy; adverse reaction to a bee sting; hernia surgery unrelated to study                                                                                             |
| Singletons                      | 34                 | 0                      | 0    | 1                    | 3                    | COPD exacerbation; knee pain from arthritis; umbilical hernia repair                                                                                                            |
| <b>Follow-Up<sup>2</sup></b>    |                    |                        |      |                      |                      |                                                                                                                                                                                 |
| Control                         | 96                 | 6                      | 0    | 0                    | 7                    | Fever and muscle aches; retina issue; uterine polyp surgery; sprained foot and ankle unrelated to study; sinus/ear infection; Broken shoulder from fall in garage; hysterectomy |
| Intervention                    | 82                 | 1                      | 1    | 0                    | 7                    | Cholecystectomy; hernia surgery and pneumonia; Planned hernia repair; thumb laceration; vomiting; unspecified surgery; diverticulitis                                           |
| Singletons                      | 38                 | 1                      | 0    | 0                    | 2                    | Thyroid cyst; heart catherization                                                                                                                                               |

<sup>1</sup>Upon further investigation by calling participants, two participants reported that their events were thought to be related to the study but both resolved by the time of the call. One participant had knee pain and one had hip pain.

<sup>2</sup>Upon further investigation by calling participants, none of the participants contacted reported that they believed the events were due to the study

*Each participant was asked to complete a self-reported survey after completion of the intervention and follow-up periods. On that survey, they could report events related to injury or hospital visits. The following table displays the number of self-report events and the results of follow-up phone calls by the study team to investigate the events.*

**eTable 9.** Participant End of Study Survey Responses by Arm

| Arm                     | Response          | I enjoyed participating in BE FIT | BE FIT helped me to increase my physical activity | I was satisfied with my experience using Way to Health | I will continue to use my activity tracker to monitor my daily step counts |
|-------------------------|-------------------|-----------------------------------|---------------------------------------------------|--------------------------------------------------------|----------------------------------------------------------------------------|
| <b>Control Arm</b>      | Strongly disagree | 1.1%                              | 1.1%                                              | 0.0%                                                   | 1.1%                                                                       |
|                         | Disagree          | 4.2%                              | 6.3%                                              | 5.3%                                                   | 10.5%                                                                      |
|                         | Neutral           | 11.6%                             | 20.0%                                             | 21.1%                                                  | 8.4%                                                                       |
|                         | Agree             | 34.7%                             | 43.2%                                             | 43.2%                                                  | 34.7%                                                                      |
|                         | Strongly agree    | 48.4%                             | 29.5%                                             | 30.5%                                                  | 45.3%                                                                      |
| <b>Gamification Arm</b> | Strongly disagree | 1.2%                              | 2.5%                                              | 1.2%                                                   | 2.5%                                                                       |
|                         | Disagree          | 1.2%                              | 4.9%                                              | 4.9%                                                   | 7.4%                                                                       |
|                         | Neutral           | 8.6%                              | 13.6%                                             | 13.6%                                                  | 11.1%                                                                      |
|                         | Agree             | 50.6%                             | 44.4%                                             | 46.9%                                                  | 33.3%                                                                      |
|                         | Strongly agree    | 38.3%                             | 34.6%                                             | 33.3%                                                  | 45.7%                                                                      |
| <b>Singleton Arm</b>    | Strongly disagree | 0.0%                              | 0.0%                                              | 0.0%                                                   | 0.0%                                                                       |
|                         | Disagree          | 2.6%                              | 10.5%                                             | 5.3%                                                   | 10.5%                                                                      |
|                         | Neutral           | 21.1%                             | 21.1%                                             | 23.7%                                                  | 10.5%                                                                      |
|                         | Agree             | 39.5%                             | 47.4%                                             | 44.7%                                                  | 36.8%                                                                      |
|                         | Strongly agree    | 36.8%                             | 21.1%                                             | 26.3%                                                  | 42.1%                                                                      |

**eFigure.** Coffee Mug Reward for Participants in the Gamification Arm Ending the Intervention in the Gold or Platinum Status

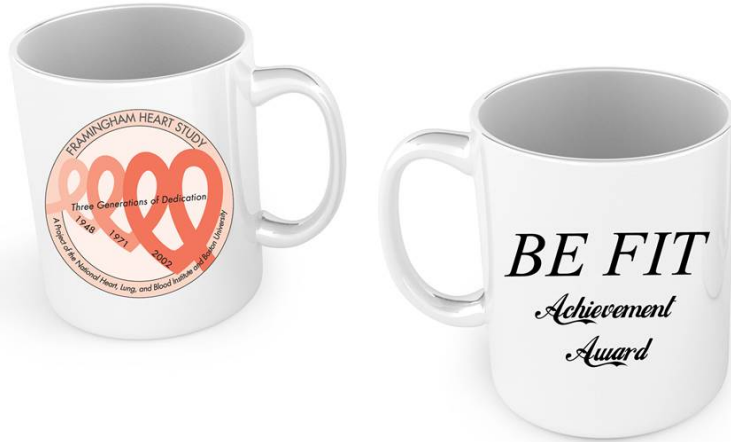

Supplement: jamainternmed-177-1586-s002.pdf [file jamainternmed-177-1586-s002.pdf]
